# Supplementary material
Source: PubMed Central journal article supplement (PMC3376181)
Supplement: NIHMS368135-supplement-03.pdf [file NIHMS368135-supplement-03.pdf]

**Table S1. Simulation Model Fits: 2 Conditions**

| <i>Simulated Data</i>                                                                | <i>Model</i>      |                 |              |                         |
|--------------------------------------------------------------------------------------|-------------------|-----------------|--------------|-------------------------|
|                                                                                      | <i>sPPI+tasks</i> | <i>sPPIplus</i> | <i>gPPI2</i> | <i>Single Condition</i> |
| <b><i>PPI Effects</i></b>                                                            |                   |                 |              |                         |
| <i>1 Condition plus fixation</i>                                                     | 0.00              | 0.00            | 0.00         | 0.00                    |
| <i>2 Conditions (A-B)</i>                                                            | -10.17            | -9.19           | -9.19        | 18.63                   |
| <i>2 Conditions</i><br><i>(effectively the same as</i><br><i>2 Conditions (A-B))</i> | -10.17            | -9.19           | -9.19        | 18.63                   |
| <i>2 Conditions</i>                                                                  | -7.28             | -77.64          | -77.64       | -63.36                  |
| <i>2 Conditions plus fixation</i>                                                    | -19.30            | -264.42         | -264.42      | -112.01                 |
| <b><i>No PPI Effects</i></b>                                                         |                   |                 |              |                         |
| <i>2 Conditions plus fixation</i>                                                    | -136.92           | -137.57         | -137.57      | -29.95                  |

Mean AIC change from the sPPI model. In this context, values from -1 to -2 indicate substantial support for sPPI and should be considered in the model selection process and interpretation; values from -4 to -7 have considerably less support for sPPI; and values below -10 essentially have no support for sPPI in the model selection process (Burnham and Anderson, 2002).

**Table S2. Simulation Model Fits: 3 Conditions, Fixation**

| <i>Model Parameters</i>             | <i>Models</i>     |                 |              |              |
|-------------------------------------|-------------------|-----------------|--------------|--------------|
|                                     | <i>sPPI+tasks</i> | <i>sPPIplus</i> | <i>gPPI2</i> | <i>gPPI3</i> |
| <i>PPI Effect</i>                   |                   |                 |              |              |
| PPIA=1;PPIB=0.75;<br>PPIC=0         | -0.7562           | -165.1731       | -165.1731    | -164.2188    |
| PPIA=1;PPIB=0.75;<br>PPIC=0.5       | -4.3131           | -115.2728       | -115.2728    | -152.9358    |
| PPIA=0.125;<br>PPIB=-0.125;PPIC=0   | -10.9448          | -11.1374        | -11.1374     | -10.1831     |
| PPIA=0.125;<br>PPIB=-0.125;PPIC=0.5 | -14.44108         | -20.76908       | -20.76908    | -58.43208    |
| <i>No PPI Effect</i>                |                   |                 |              |              |
| PPIA=0;PPIB=0;<br>PPIC=0            | -10.9448          | -11.1374        | -11.1374     | -10.1831     |
| PPIA=0;PPIB=0;<br>PPIC=0.5          | -14.44108         | -20.76908       | -20.76908    | -58.43208    |
| PPIA=0;PPIB=0;<br>PPIC=-0.5         | -2.7064           | -8.9411         | -8.9411      | -44.6131     |

Mean AIC change from sPPI model. In this context, values from -1 to -2 indicate substantial support for sPPI and should be considered in the model selection process and interpretation; values from -4 to -7 have considerably less support for sPPI; and values below -10 essentially have no support for sPPI in the model selection process (Burnham and Anderson, 2002)

**Table S3. sPPI: PV>N contrast**

| <i>Cluster Size</i> | <i>Peak T-statistic</i> | <i>Peak X,Y,Z</i>  | <i>Region</i>                                 | <i>gPPI2</i>  | <i>gPPI3</i>  |
|---------------------|-------------------------|--------------------|-----------------------------------------------|---------------|---------------|
| 256                 | 4.5923                  | 18,56,6            | R. Superior Frontal Gyrus                     | -0.63         | 2.53          |
|                     | 3.1503                  | 26,44,2            | R. Middle Frontal Gyrus                       |               |               |
| 145                 | 3.4918                  | 26,-32,40          | R. Postcentral Gyrus                          | 0.29          | 3.59          |
| <b>594</b>          | <b>3.4741</b>           | <b>40,-56,-20</b>  | <b>R. Fusiform</b>                            | <b>-63.97</b> | <b>-62.05</b> |
|                     | <b>3.4027</b>           | <b>20,-84,-16</b>  | <b>R. Cerebellum</b>                          |               |               |
|                     | <b>2.9215</b>           | <b>32,-68,-18</b>  | <b>R. Fusiform</b>                            |               |               |
|                     | <b>2.5887</b>           | <b>16,-96,-6</b>   | <b>R. Calcarine Sulcus</b>                    |               |               |
| 149                 | 3.4199                  | 18,-8,52           | R. Supplemental Motor Area                    | -4.71         | -1.96         |
|                     | 3.0916                  | 22,-16,62          | R. Precentral Gyrus                           |               |               |
| <b>211</b>          | <b>3.3672</b>           | <b>-2,-8,62</b>    | <b>L. Supplemental Motor Area</b>             | <b>-24.97</b> | <b>-22.83</b> |
| 113                 | 3.341                   | -14,28,26          | L. Anterior Cingulate                         | -2.77         | 0.68          |
| 288                 | 3.3201                  | 30,14,26           | R. Inferior Frontal Gyrus - Pars Triangularis | -6.19         | -3.79         |
|                     | 3.0813                  | 34,22,22           | R. Middle Frontal Gyrus                       |               |               |
|                     | 3.0031                  | 18,20,18           | R. Caudate                                    |               |               |
|                     | 2.4654                  | 20,30,16           | R. Anterior Cingulate Cortex                  |               |               |
| <b>109</b>          | <b>3.2134</b>           | <b>-22,-84,-12</b> | <b>L. Fusiform</b>                            | <b>-58.10</b> | <b>-55.49</b> |
| <b>60</b>           | <b>3.1279</b>           | <b>4,-20,14</b>    | <b>R. Thalamus</b>                            | <b>-1.48</b>  | <b>1.58</b>   |
| <b>184</b>          | <b>3.0597</b>           | <b>-32,-18,44</b>  | <b>L. Precentral Gyrus</b>                    | <b>-20.62</b> | <b>-17.70</b> |
|                     | <b>3.0011</b>           | <b>-30,-20,60</b>  | <b>L. Precentral Gyrus</b>                    |               |               |
|                     | <b>2.9813</b>           | <b>-18,-16,64</b>  | <b>L. Paracentral Lobule</b>                  |               |               |
| 221                 | 3.01                    | 48,-76,10          | R. Middle Temporal Gyrus                      | -17.10        | -14.53        |
|                     | 3.0074                  | 40,-72,12          | R. Middle Occipital Gyrus                     |               |               |
|                     | 2.6437                  | 28,-68,22          | R. Superior Occipital Gyrus                   |               |               |
| 67                  | 2.9583                  | 30,-88,16          | R. Middle Occipital Gyrus                     | -59.19        | -57.06        |
| 61                  | 2.9485                  | 44,-30,-6          | R. Superior Temporal Gyrus                    | -0.24         | 2.62          |
| 139                 | 2.8433                  | 28,-48,40          | R. Angular Gyrus                              | -15.10        | -12.38        |

The last two columns are the mean AIC change from sPPI for the cluster. **Bolded** clusters do not overlap at all with clusters in the gPPI models. The cluster with peak at 30,-88,16 only had 2 voxels that overlapped with a cluster in gPPI3 (peaks at 38,-66,-14 and 28,-78,10), which indicates its likely a different cluster and explains the large decrease in AIC. The same is true of other clusters with large decreases, where there is a significant amount of non-overlap.

**Table S4. gPPI2: PV>N contrast**

| <i>Cluster Size</i> | <i>Peak T-statistic</i> | <i>Peak X,Y,Z</i>                        | <i>Region</i>                                 | <i>gPPI2</i>  | <i>gPPI3</i> |
|---------------------|-------------------------|------------------------------------------|-----------------------------------------------|---------------|--------------|
| 925                 | 4.8717                  | 18,56,6                                  | R. Superior Frontal Gyrus                     | -2.22         | 0.65         |
|                     | 3.5184                  | 30,14,26                                 | R. Inferior Frontal Gyrus - Pars Triangularis |               |              |
|                     | 3.4282                  | 18,18,20                                 | R. Caudate                                    |               |              |
|                     | 3.329                   | 34,22,20                                 | R. Middle Frontal Gyrus                       |               |              |
|                     | 3.0369                  | 26,42,2                                  | R. Middle Frontal Gyrus                       |               |              |
|                     | 2.936                   | 20,30,14                                 | R. Caudate                                    |               |              |
|                     | 2.7604                  | -8,62,2                                  | R. Medial Superior Frontal Gyrus              |               |              |
|                     | 2.7047                  | 38,16,14                                 | R. Inferior Frontal Operculum                 |               |              |
|                     | 2.6842                  | 6,62,4                                   | R. Medial Superior Frontal Gyrus              |               |              |
|                     | 2.5565                  | 18,34,6                                  | R. Anterior Cingulate Cortex                  |               |              |
| 2.5014              | 22,46,-8                | R. Superior Frontal Gyrus - Orbital Part |                                               |               |              |
| 263                 | 3.7089                  | -14,26,26                                | L. Anterior Cingulate Cortex                  | -1.55         | 2.04         |
|                     | 3.0004                  | -28,12,32                                | L. Middle Frontal Gyrus                       |               |              |
|                     | 2.9125                  | -18,14,34                                | L. Middle Cingulate Cortex                    |               |              |
| 370                 | 3.5158                  | 24,-32,38                                | R. Postcentral Gyrus                          | -0.42         | 3.00         |
|                     | 3.0127                  | 26,-44,36                                | R. Angular Gyrus                              |               |              |
|                     | 2.9488                  | 18,-24,36                                | R. Middle Cingulate Cortex                    |               |              |
|                     | 2.6324                  | 32,-18,42                                | R. Precentral Gyrus                           |               |              |
|                     | 2.6184                  | 26,-52,36                                | R. Angular Gyrus                              |               |              |
|                     | 2.5579                  | 20,-40,26                                | R. Posterior Cingulate Cortex                 |               |              |
| 174                 | 3.3973                  | 44,-32,-6                                | R. Middle Temporal Gyrus                      | -0.34         | 2.54         |
|                     | 2.9019                  | 44,-40,-10                               | R. Inferior Temporal Gyrus                    |               |              |
| 57                  | 3.2983                  | 18,-8,52                                 | R. Supplemental Motor Area                    | -3.71         | -0.83        |
| 60                  | 3.1821                  | 22,-18,64                                | R. Precentral Gyrus                           | -3.38         | -0.65        |
| <b>144</b>          | <b>3.0492</b>           | <b>-50,-64,30</b>                        | <b>L. Angular Gyrus</b>                       | <b>-11.51</b> | <b>-9.21</b> |
|                     | <b>2.54</b>             | <b>-42,-68,40</b>                        | <b>L. Angular Gyrus</b>                       |               |              |
| 154                 | 3.0348                  | 20,44,32                                 | R. Superior Frontal Gyrus                     | -4.31         | -1.56        |
|                     | 2.7736                  | 20,36,42                                 | R. Superior Frontal Gyrus                     |               |              |
|                     | 2.7168                  | 30,40,30                                 | R. Middle Frontal Gyrus                       |               |              |
|                     | 2.7052                  | 22,26,44                                 | R. Middle Frontal Gyrus                       |               |              |
| 67                  | 2.908                   | 38,-68,12                                | R. Middle Occipital Gyrus                     | -8.29         | -5.27        |
| 90                  | 2.8647                  | 34,10,42                                 | R. Middle Frontal Gyrus                       | -6.09         | -3.36        |

NOTES: The last two columns are the mean AIC change from sPPI for the cluster. **Bolded** clusters do not overlap at all with clusters in the sPPI or gPPI3 models.

**Table S5. gPPI3: PV>N contrast**

| <i>Cluster Size</i> | <i>Peak T-statistic</i> | <i>Peak X,Y,Z</i> | <i>Region</i>                                    | <i>gPPI2</i> | <i>gPPI3</i> |
|---------------------|-------------------------|-------------------|--------------------------------------------------|--------------|--------------|
| 101                 | 3.8151                  | 18,56,6           | R. Superior Frontal Gyrus                        | -1.44        | 1.81         |
|                     | 2.5598                  | 24,60,-6          | R. Superior Frontal Gyrus -<br>Orbital Part      |              |              |
| 209                 | 3.6349                  | 44,-30,-6         | R. Superior Temporal Gyrus                       | -0.24        | 2.66         |
| 91                  | 3.4799                  | -14,22,24         | L. Anterior Cingulate Cortex                     | -2.01        | 1.52         |
| 722                 | 3.4677                  | 28,14,28          | R. Inferior Frontal Gyrus -<br>Pars Triangularis | -4.17        | -1.60        |
|                     | 3.357                   | 16,18,18          | R. Caudate                                       |              |              |
|                     | 3.2064                  | 34,8,42           | R. Middle Frontal Gyrus                          |              |              |
|                     | 3.1933                  | 42,26,46          | R. Middle Frontal Gyrus                          |              |              |
|                     | 3.0015                  | 36,24,20          | R. Middle Frontal Gyrus                          |              |              |
|                     | 2.8436                  | 20,30,14          | R. Caudate                                       |              |              |
|                     | 2.7053                  | 18,34,6           | R. Anterior Cingulate Cortex                     |              |              |
|                     | 2.5557                  | 30,36,16          | R. Middle Frontal Gyrus                          |              |              |
| 422                 | 3.3708                  | 26,-32,40         | R. Postcentral Gyrus                             | -0.91        | 2.41         |
|                     | 3.1564                  | 16,-16,36         | R. Middle Cingulate Cortex                       |              |              |
|                     | 2.9925                  | 32,-18,44         | R. Precentral Gyrus                              |              |              |
|                     | 2.9236                  | 36,-18,52         | R. Precentral Gyrus                              |              |              |
|                     | 2.8287                  | 36,-34,30         | White Matter                                     |              |              |
|                     | 2.6906                  | 36,-22,28         | R. Insula                                        |              |              |
| 179                 | 3.36                    | 38,-66,14         | R. Middle Occipital Gyrus                        | -12.15       | -9.23        |
|                     | 2.5523                  | 28,-78,10         | R. Calcarine Sulcus                              |              |              |
| 109                 | 3.3027                  | 18,-8,52          | R. Supplemental Motor Area                       | -3.79        | -0.95        |
|                     | 3.0984                  | 24,-16,62         | R. Precentral Gyrus                              |              |              |
| 162                 | 3.2409                  | 26,-54,36         | R. Angular                                       | -13.87       | -11.18       |
|                     | 2.9821                  | 28,-46,38         | R. Angular                                       |              |              |
| <b>79</b>           | <b>3.2267</b>           | <b>8,-38,10</b>   | <b>R. Posterior Cingulate<br/>Cortex</b>         | <b>-2.67</b> | <b>-0.20</b> |
| <b>160</b>          | <b>3.0971</b>           | <b>28,-16,4</b>   | <b>R. Putamen</b>                                | <b>-1.86</b> | <b>0.38</b>  |
|                     | <b>2.7517</b>           | <b>32,-4,6</b>    | <b>R. Putamen</b>                                |              |              |
|                     | <b>2.6935</b>           | <b>22,0,-2</b>    | <b>R. Globus Pallidum</b>                        |              |              |
| 88                  | 2.8464                  | 18,46,32          | R. Superior Frontal Gyrus                        | -4.79        | -2.48        |
|                     | 2.7761                  | 30,40,30          | R. Middle Frontal Gyrus                          |              |              |

NOTES: The last two columns are the mean AIC change from sPPI for the cluster. **Bolded** clusters do not overlap at all with clusters in the sPPI or gPPI2 models. The cluster with peaks at 38,-66,-14 and 28,-78,10 only had 2 voxels that overlapped with a cluster in sPPI (peak at 30,-88,16), which indicates its likely a different cluster and explains the large decrease in AIC. The same is true of other clusters with large decreases, where there is a significant amount of non-overlap.

**Table S6. Psychophysiological Interaction Model Fits: Change in AIC from sPPI**

| <i>gPPI AIC -<br/>sPPI AIC</i> | <i>Number of Subjects</i> |           |           |           |           |           |           |
|--------------------------------|---------------------------|-----------|-----------|-----------|-----------|-----------|-----------|
|                                | <i>10</i>                 | <i>20</i> | <i>30</i> | <i>40</i> | <i>50</i> | <i>60</i> | <i>70</i> |
| <i>0</i>                       | 3945                      | 3944      | 3358      | 2446      | 1810      | 1267      | 319       |
| <i>-1</i>                      | 3945                      | 3850      | 2872      | 2163      | 1627      | 1151      | 208       |
| <i>-2</i>                      | 3945                      | 3528      | 2553      | 1928      | 1484      | 1023      | 137       |
| <i>-4</i>                      | 3882                      | 2790      | 2102      | 1648      | 1291      | 839       | 53        |
| <i>-5</i>                      | 3722                      | 2593      | 1939      | 1569      | 1206      | 781       | 34        |
| <i>-7</i>                      | 3191                      | 2245      | 1737      | 1401      | 1058      | 689       | 16        |
| <i>-10</i>                     | 2602                      | 1846      | 1547      | 1213      | 900       | 552       | 1         |

Number of voxels that have N subjects with AIC in gPPI being less than X of the AIC in sPPI within a mask of voxels that had a significant difference in PV>N for sPPI or gPPI models at  $p < 0.01$  in at least 50 voxels. Maximum number of voxels is 3945.
